# Supplementary figures and images for: Thermal conductance bottleneck of a three dimensional graphene–CNT hybrid structure: a molecular dynamics simulation
Source: Royal Society of Chemistry journal article supplement (doi:10.1039/c9cp05228c), 2019-12-02

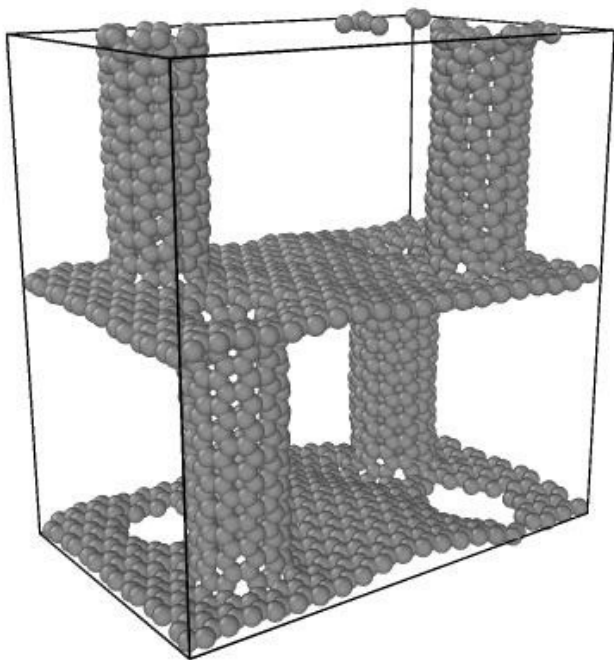

Supplement: c9cp05228c1.pdf [file c9cp05228c1.pdf]
